# Supplementary material for: A Virulent Strain of Deformed Wing Virus (DWV) of Honeybees (Apis mellifera) Prevails after Varroa destructor-Mediated, or In Vitro, Transmission
Source: PubMed Central journal article supplement (PMC4072795; doi:10.1371/journal.ppat.1004230), 2014-06-26

**Figure S2. Differential expression of independent gene sets in response to oral DWV infection, exposure to *Varroa* mite feeding, and high DWV levels.**

**A Differentially expressed genes in the contrasts**

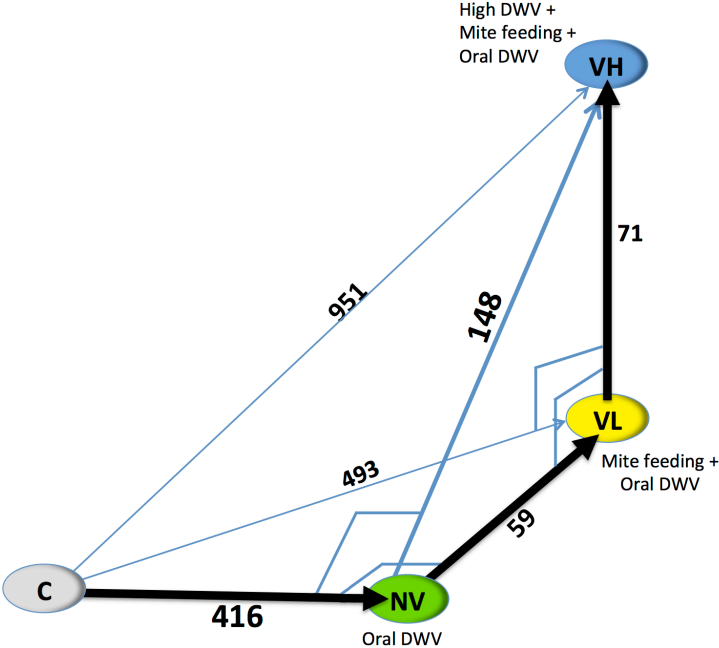

**B Orthogonal commonalty**

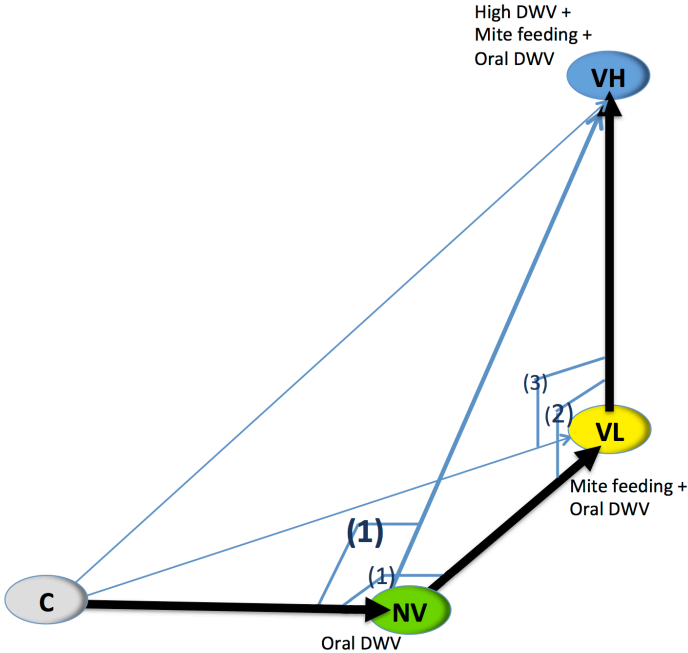

**C Non-orthogonal commonalty**

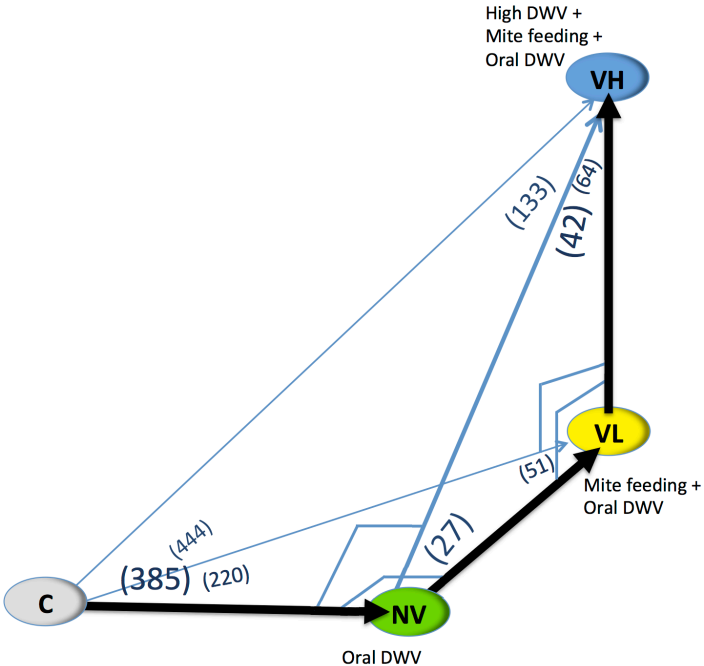

Supplement: ppat.1004230.s002.pdf [file ppat.1004230.s002.pdf]
