# Supplementary material for: A Virulent Strain of Deformed Wing Virus (DWV) of Honeybees (Apis mellifera) Prevails after Varroa destructor-Mediated, or In Vitro, Transmission
Source: PubMed Central journal article supplement (PMC4072795; doi:10.1371/journal.ppat.1004230), 2014-06-26

**Figure S3. Principal component analysis (PCA) produced with 30 genes selected from the top genes from each contrast ranked by adjusted  $p$ -value.**

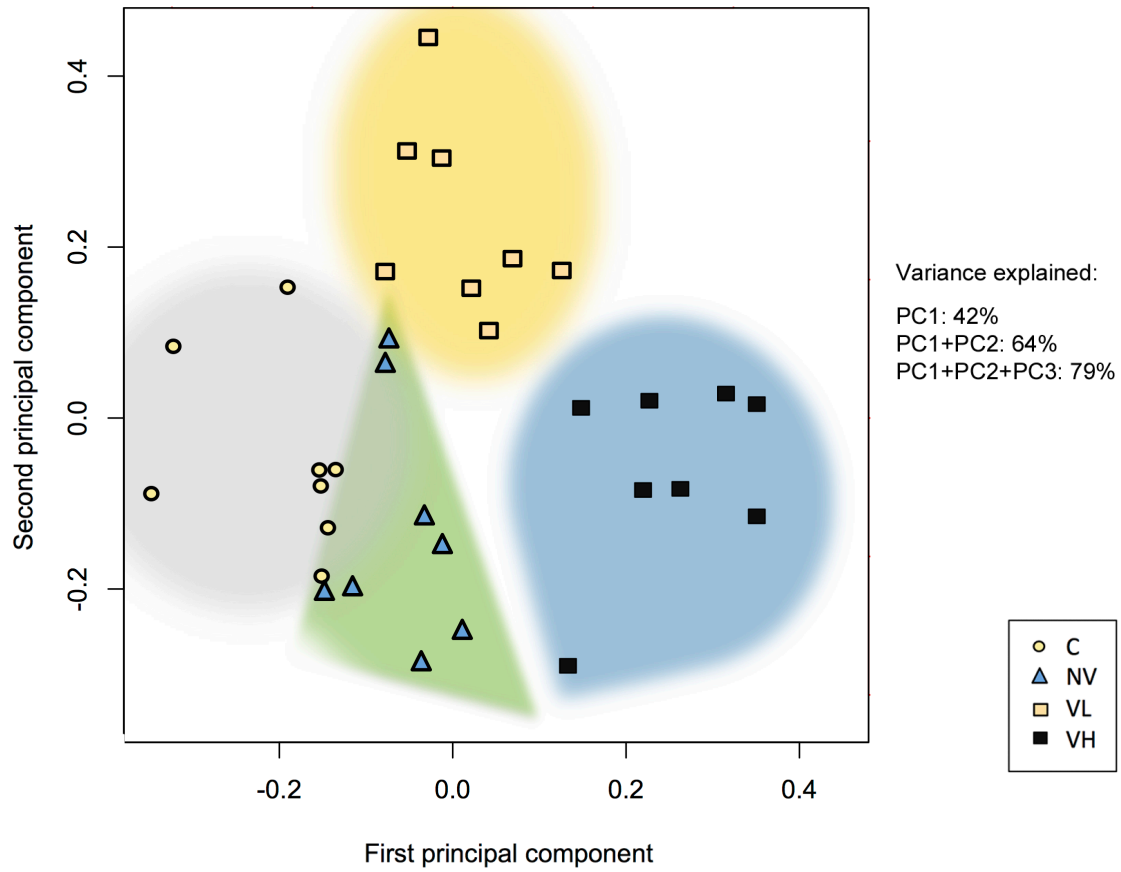

Supplement: ppat.1004230.s003.pdf [file ppat.1004230.s003.pdf]
