# Supplementary material for: A Virulent Strain of Deformed Wing Virus (DWV) of Honeybees (Apis mellifera) Prevails after Varroa destructor-Mediated, or In Vitro, Transmission
Source: PubMed Central journal article supplement (PMC4072795; doi:10.1371/journal.ppat.1004230), 2014-06-26

**Figure S7. Genetic diversity of DWV in the honeybee groups.**

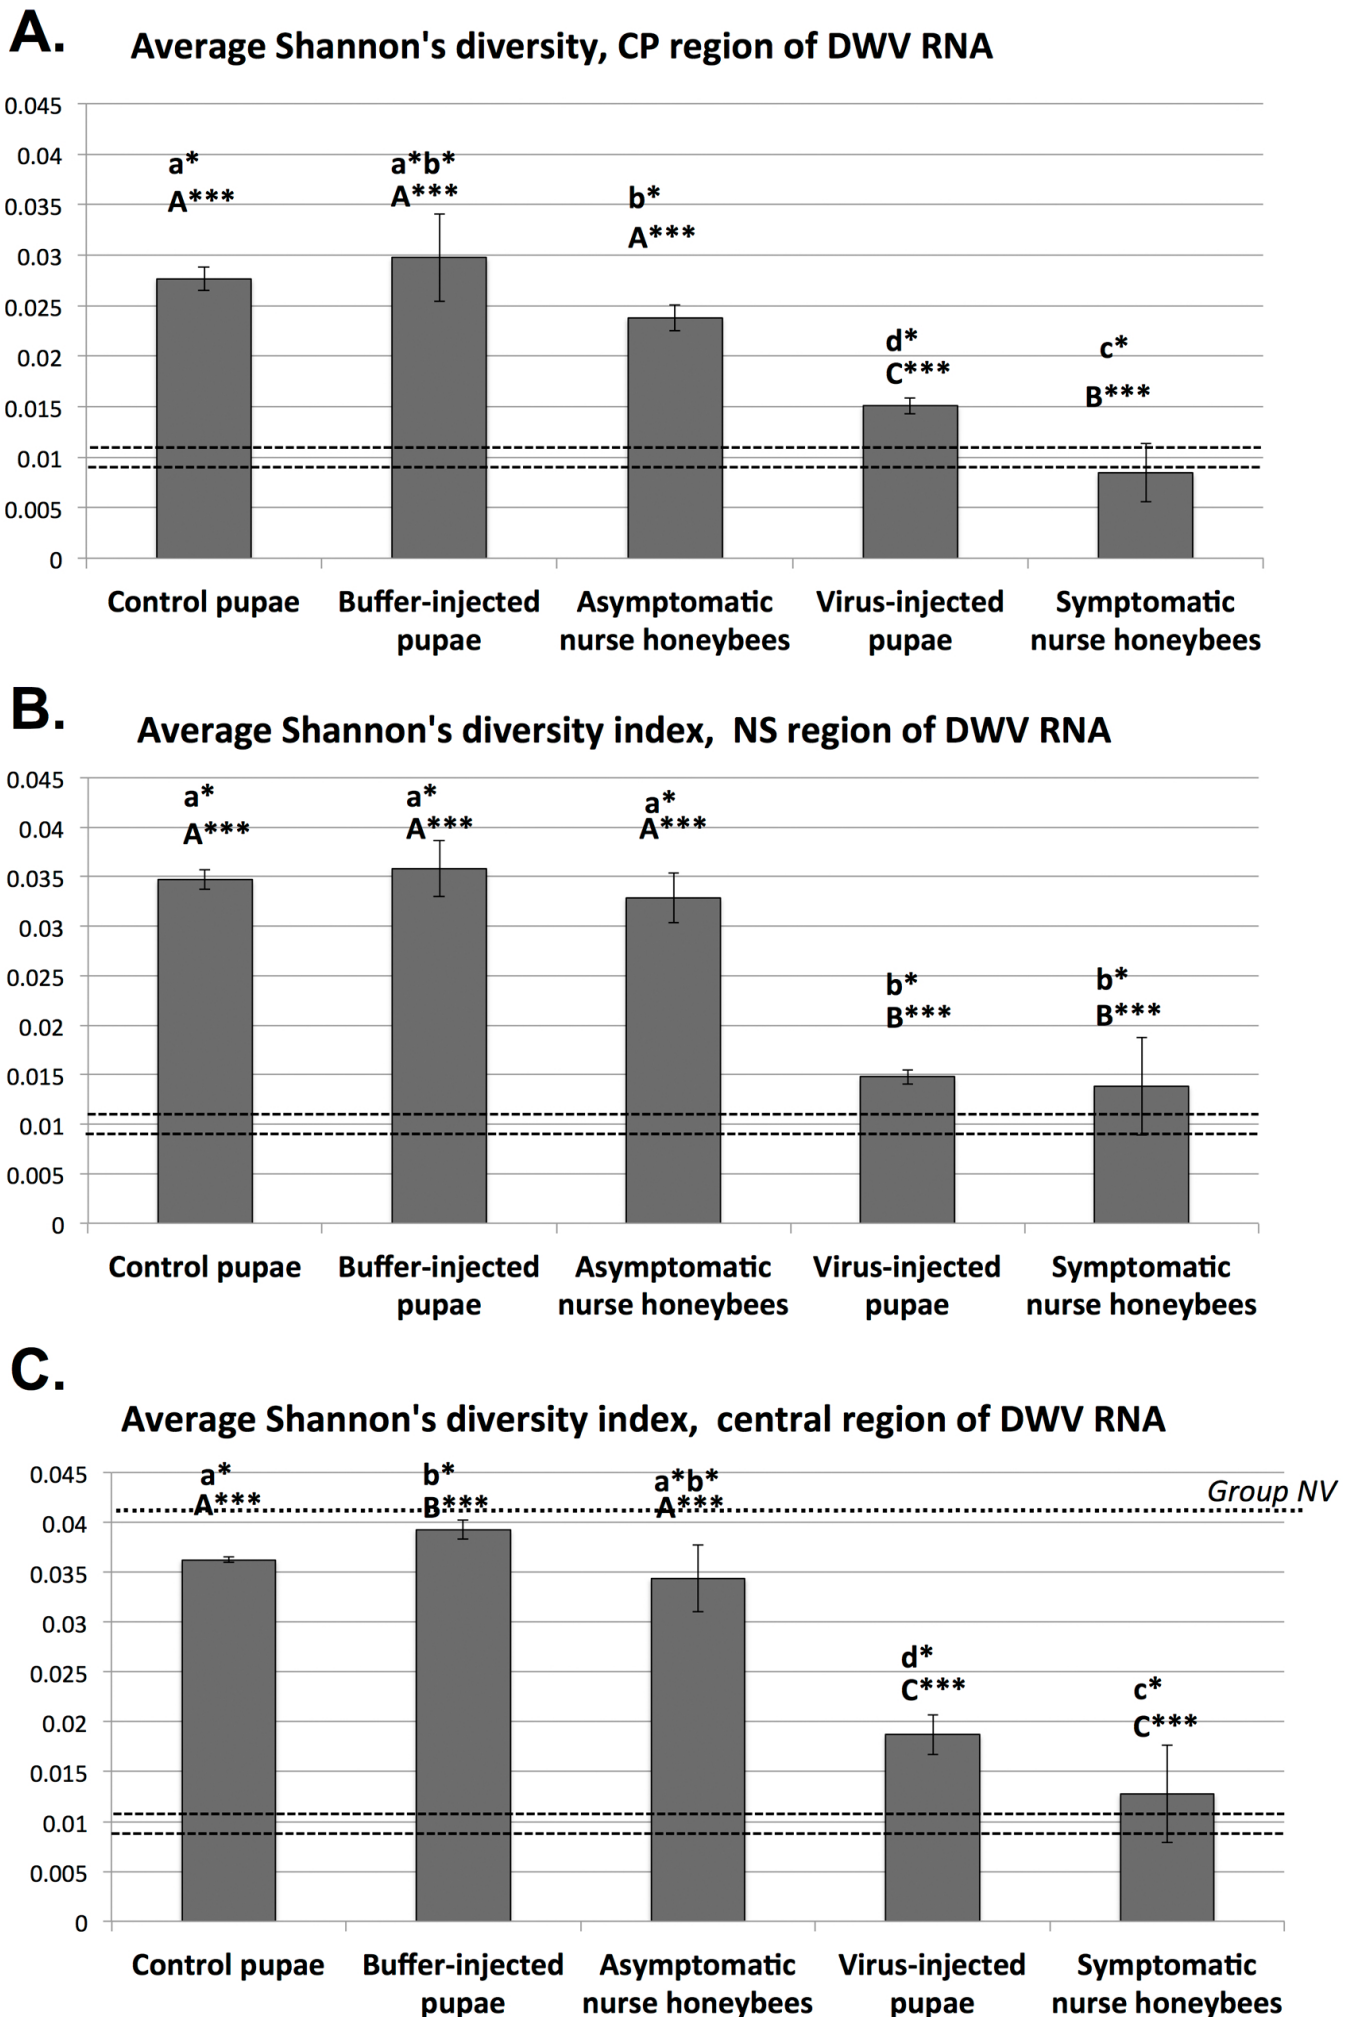

Supplement: ppat.1004230.s007.pdf [file ppat.1004230.s007.pdf]
