# Supplementary material for: A Virulent Strain of Deformed Wing Virus (DWV) of Honeybees (Apis mellifera) Prevails after Varroa destructor-Mediated, or In Vitro, Transmission
Source: PubMed Central journal article supplement (PMC4072795; doi:10.1371/journal.ppat.1004230), 2014-06-26
Supplement: ppat.1004230.s010.pdf [file ppat.1004230.s010.pdf]

**Table S3. Summary of gene expression commonality between the contrasts.**

| <b>All Genes (n=1054)</b> |             |             |             |              |              |              |
|---------------------------|-------------|-------------|-------------|--------------|--------------|--------------|
| <b>All, ↑, ↓</b>          | <b>NVvC</b> | <b>VLvC</b> | <b>VHvC</b> | <b>VLvNV</b> | <b>VHvNV</b> | <b>VHvVL</b> |
| <b>NVvC</b>               | 416,192,224 | 220,96,124  | 385,177,208 | 1,0,0        | 1,0,0        | 7,6,0        |
| <b>VLvC</b>               |             | 493,153,340 | 444,141,303 | 51,1,50      | 57,4,52      | 3,0,0        |
| <b>VHvC</b>               |             |             | 951,393,558 | 34,1,33      | 133,48,85    | 64,42,22     |
| <b>VLvNV</b>              |             |             |             | 59,2,57      | 27,0,27      | 2,0,0        |
| <b>VHvNV</b>              |             |             |             |              | 148,53,95    | 42,29,13     |
| <b>VHvVL</b>              |             |             |             |              |              | 71,48,23     |

  

| <b>Immune-related genes</b> |             |             |             |              |              |              |
|-----------------------------|-------------|-------------|-------------|--------------|--------------|--------------|
| <b>All, ↑, ↓</b>            | <b>NVvC</b> | <b>VLvC</b> | <b>VHvC</b> | <b>VLvNV</b> | <b>VHvNV</b> | <b>VHvVL</b> |
| <b>NVvC</b>                 | 18,11,7     | 12,7,5      | 17,10,7     | 0,0,0        | 0,0,0        | 0,0,0        |
| <b>VLvC</b>                 |             | 26,7,19     | 22,6,16     | 6,0,6        | 2,0,2        | 0,0,0        |
| <b>VHvC</b>                 |             |             | 42,14,28    | 4,0,4        | 6,0,6        | 3,0,3        |
| <b>VLvNV</b>                |             |             |             | 7,0,7        | 3,0,3        | 0,0,0        |
| <b>VHvNV</b>                |             |             |             |              | 7,1,6        | 3,1,2        |
| <b>VHvVL</b>                |             |             |             |              |              | 4,1,3        |

Number of differentially expressed genes common to pairs of contrasts. In each cell (corresponding to the pair of contrasts) the three figures show the commonality for all differentially expressed genes in the pair, the up-regulated genes in the pair, and the down-regulated genes in the pair respectively.
