# Supplementary material for: A Virulent Strain of Deformed Wing Virus (DWV) of Honeybees (Apis mellifera) Prevails after Varroa destructor-Mediated, or In Vitro, Transmission
Source: PubMed Central journal article supplement (PMC4072795; doi:10.1371/journal.ppat.1004230), 2014-06-26
Supplement: ppat.1004230.s016.pdf [file ppat.1004230.s016.pdf]

## **Text S1. Next generation sequencing: error correction and diversity testing outline.**

### **i) Correction for next-generation sequencing error**

An error model is assumed for the mutation process, calibrated using the next-generation sequencing of a known clonal sample and then used for correction.

### **ii) Confidence interval for average nucleotide diversity**

- a) The variance of a single diversity is found using the  $\Delta$ -method.
- b) The variance of mean diversity is found, accommodating the correlation between adjacent diversities.
- c) Hence a 95% confidence interval can be calculated.

### **iii) Threshold for clonal diversity**

- a) The error rate after next-generation sequencing correction is estimated using the clonal sample.
- b) Simulation is used to generate individual, and then mean, diversity values, based on error at the corrected rate.
- c) The 95th percentile of the distribution of mean diversities is the required threshold.
