# Supplementary material for: A Virulent Strain of Deformed Wing Virus (DWV) of Honeybees (Apis mellifera) Prevails after Varroa destructor-Mediated, or In Vitro, Transmission
Source: PLOS journal article supplement (doi:10.1371/journal.ppat.1004230), 2014-06-26

Figure S1. Bimodal distribution of DWV accumulation in the experimental honeybee pupae.

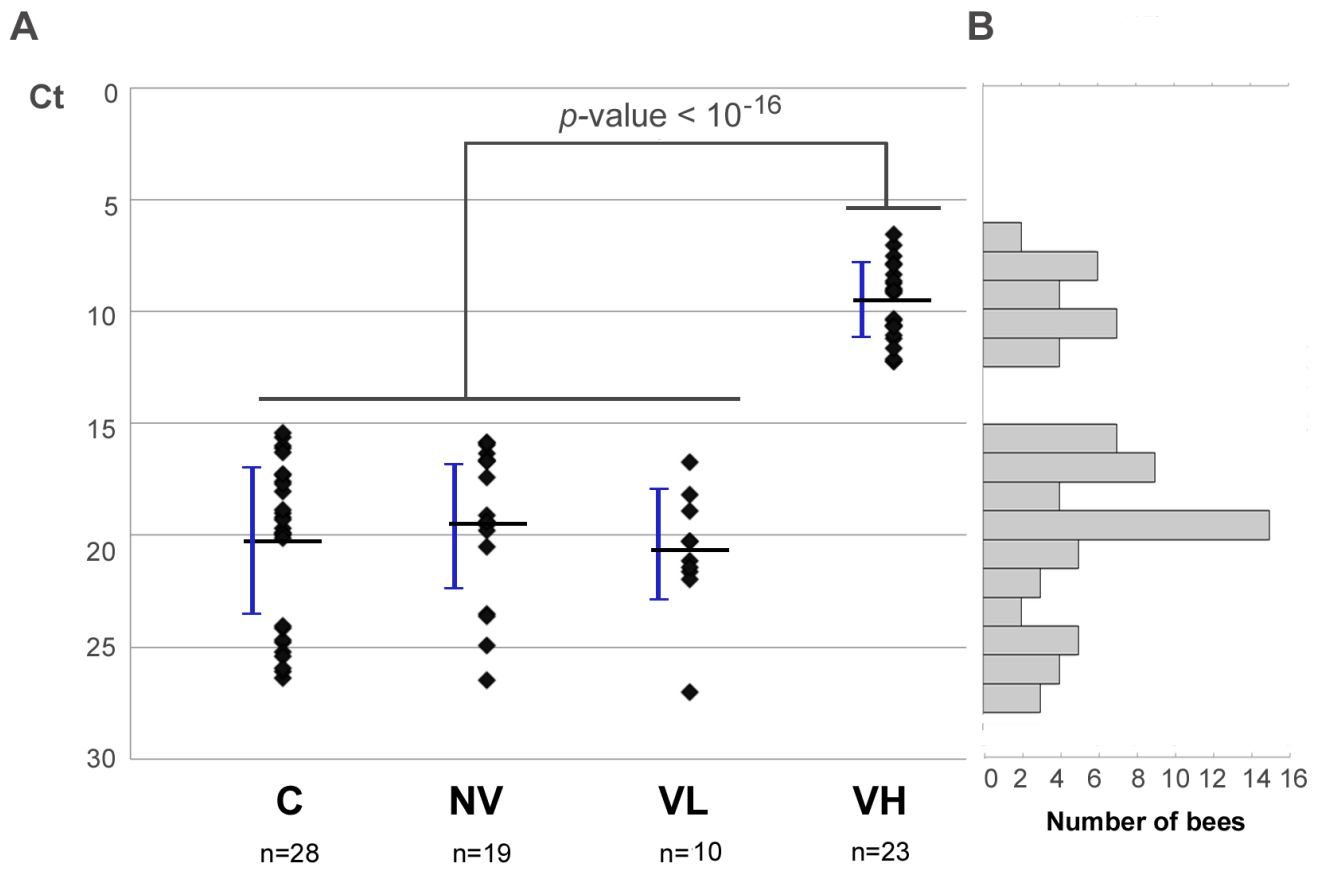

Supplement: S1 (10.1371/journal.ppat.1004230.s001) [file journal.ppat.1004230.s001]
