# Supplementary material for: A Virulent Strain of Deformed Wing Virus (DWV) of Honeybees (Apis mellifera) Prevails after Varroa destructor-Mediated, or In Vitro, Transmission
Source: PLOS journal article supplement (doi:10.1371/journal.ppat.1004230), 2014-06-26
Supplement: S14 (10.1371/journal.ppat.1004230.s014) [file journal.ppat.1004230.s014]

**Table S7. Summary of the NGS libraries and consensus viral sequences from individual honeybees from Varroa-infested colony.**

| Sample                        | Total NGS reads | Total DWV and VDV-1 reads | Proportion of DWV and VDV-1 reads | Corrected Average Shannons's diversity index |           | Nucleotide identity with KJ437447 | Amino acid identity with KJ437447 ORF (positions 1145-9826) | Nucleotide identity with VH group sequence JX661656 (positions 4926-5255) | Amino acid identity with VH group sequence JX661656 |
|-------------------------------|-----------------|---------------------------|-----------------------------------|----------------------------------------------|-----------|-----------------------------------|-------------------------------------------------------------|---------------------------------------------------------------------------|-----------------------------------------------------|
|                               |                 |                           |                                   | CP region                                    | NS region |                                   |                                                             |                                                                           |                                                     |
| Control pupa 1                | 9768526         | 8066                      | 0.083%                            | 0.04535                                      | 0.05480   | 98.74%                            | 99.76%                                                      | 98.57%                                                                    | 100%                                                |
| Control pupa 2                | 11494319        | 6257                      | 0.054%                            | 0.04195                                      | 0.04690   | 98.38%                            | 99.24%                                                      | 98.42%                                                                    | 100%                                                |
| Buffer-injected pupa 1        | 10284715        | 5775                      | 0.056%                            | 0.04870                                      | 0.05645   | 98.71%                            | 99.76%                                                      | 98.65%                                                                    | 100%                                                |
| Buffer-injected pupa 2        | 9080182         | 3285                      | 0.036%                            | 0.05015                                      | 0.05290   | 98.01%                            | 99.27%                                                      | 98.27%                                                                    | 100%                                                |
| Asymptomatic nurse honeybee 1 | 7896051         | 9080                      | 0.115%                            | 0.04200                                      | 0.04150   | 98.92%                            | 99.79%                                                      | 98.35%                                                                    | 100%                                                |
| Asymptomatic nurse honeybee 2 | 9405711         | 5664                      | 0.060%                            | 0.04185                                      | 0.04690   | 98.30%                            | 99.65%                                                      | 98.35%                                                                    | 100%                                                |
| Virus-injected pupa 1         | 10199537        | 755669                    | 7.409%                            | 0.01710                                      | 0.01470   | 99.16%                            | 99.83%                                                      | 98.50%                                                                    | 100%                                                |
| Virus-injected pupa 2         | 11277902        | 1367858                   | 12.129%                           | 0.01575                                      | 0.01305   | 99.16%                            | 99.83%                                                      | 98.50%                                                                    | 100%                                                |
| Virus-injected pupa 3         | 10253990        | 922841                    | 9.000%                            | 0.01610                                      | 0.01375   | 99.16%                            | 99.83%                                                      | 98.50%                                                                    | 100%                                                |
| Symptomatic nurse honeybee 1  | 8919720         | 6382279                   | 71.552%                           | 0.01000                                      | 0.00980   | 99.16%                            | 99.83%                                                      | 98.50%                                                                    | 100%                                                |
| Symptomatic nurse honeybee 2  | 9998633         | 6767911                   | 67.688%                           | 0.01155                                      | 0.01330   | 98.59%                            | 99.59%                                                      | 99.47%                                                                    | 100%                                                |
| Symptomatic nurse honeybee 3  | 8900999         | 5145729                   | 57.811%                           | 0.01450                                      | 0.01290   | 99.67%                            | 99.76%                                                      | 99.85%                                                                    | 100%                                                |
| Symptomatic nurse honeybee 4  | 9556537         | 8015413                   | 83.874%                           | 0.01765                                      | 0.02120   | 99.17%                            | 99.79%                                                      | 98.57%                                                                    | 100%                                                |

RNA-seq libraries were produced using poly(A) RNA extracts. The reads were aligned to the reference full-length DWV and VDV-1 sequences, GenBank Accession numbers GU109335 and AY251269 respectively, using the "--very-sensitive-local" option which allowed the highest number of mismatches. The aligned reads were used to generate consensus nucleotide sequences. The assembled viral sequences showed highest identity with the DWV-VDV-1 recombinant clone identified in the sampled colony (GenBank Accession number KJ437447) and the group VH sequences (e.g. GenBank Accession number JX661656).
